# Supplementary material for: Priority areas and implementation of ecological corridor through forest restoration to safeguard biodiversity
Source: PubMed Central journal article supplement (PMC11681200; doi:10.1038/s41598-024-81483-y), 2024-12-28
Supplement: 41598_2024_81483_MOESM1_ESM.pdf [file 41598_2024_81483_MOESM1_ESM.pdf]

## Supplementary Material

### Priority areas and implementation of ecological corridor through forest restoration to safeguard biodiversity

Mayara Guimarães Beltrão<sup>1,\*</sup>, Camila Francisco Gonçalves<sup>2,6</sup>, Pedro H. S. Brancalion<sup>3</sup>, Ana Paula Carmignotto<sup>4</sup>, Luis Fábio Silveira<sup>1</sup>, Pedro Manoel Galetti Jr.<sup>5</sup>, Mauro Galetti<sup>6</sup>

<sup>1</sup>Museu de Zoologia da Universidade de São Paulo, São Paulo, SP, Brazil

<sup>2</sup>Programa de Pós-Graduação em Ecologia e Recursos Naturais, Universidade Federal de São Carlos, São Carlos, SP, Brazil

<sup>3</sup>Departamento de Ciências Florestais, Escola Superior de Agricultura Luiz de Queiroz, Piracicaba, SP, Brazil

<sup>4</sup>Departamento de Biologia, Universidade Federal de São Carlos, Sorocaba, SP, Brazil

<sup>5</sup>Departamento de Genética e Evolução, Universidade Federal de São Carlos, São Carlos, SP, Brazil

<sup>6</sup>Departamento de Biodiversidade, Universidade Estadual Paulista, Rio Claro, SP, Brazil

\*mayarabeltrao@gmail.com / +55 83 99912-2272

**Table S1** Land use and cover types recorded in the study area.

| Land use and land cover           | Hectare   | Percentage (%) |
|-----------------------------------|-----------|----------------|
| Pasture                           | 565828,88 | 39             |
| Sugarcane                         | 366367,59 | 25             |
| Forest                            | 185747,39 | 13             |
| Urban Infrastructure              | 24464,35  | 2              |
| River, Lake and Ocean             | 24193,82  | 2              |
| Others                            |           |                |
| Mosaic of Agriculture and Pasture | 145735,43 | 10             |
| Other Temporary Crops             | 123461,51 | 8              |
| Savanna Formation                 | 19514,53  | 1              |
| Beach and Dune                    | 4730,05   | 0              |
| Mangrove                          | 4211,22   | 0              |
| Other Non-Forest Native Formation | 2609,05   | 0              |
| Other Non Vegetated Area          | 575,68    | 0              |
| Aquaculture                       | 35,34     | 0              |
| Salt Flat                         | 60,07     | 0              |

**Table S2** Identification (Id), size (ha) and location (decimal degrees) of the thirteen priority

21 forest fragments for the study area. Categories of conservation units according to Brazilian  
 22 legislation: APA = Environmental Protection Area (in Portuguese, Área de Proteção  
 23 Ambiental); APP = Permanent Preservation Area (in Portuguese, Área de Preservação  
 24 Permanente); ESEC = Ecological Station (in Portuguese, Estação Ecológica); REBIO =  
 25 Biological Reserve (in Portuguese, Reserva Biológica); RL = Legal Reserve (in Portuguese,  
 26 Reserva Legal); RPPN = Private Natural Heritage Reserve (in Portuguese, Reserva Particular  
 27 do Patrimônio Natural).

| Fragment Id | Fragment size | Geographic coordinates |             | Fragment name                    |
|-------------|---------------|------------------------|-------------|----------------------------------|
|             |               | Longitude              | Latitude    |                                  |
| 1           | 1,636.1       | -35.216559°            | -8.894179°  | RPPN Eco Fazenda Morim/RL locais |
| 2           | 2,418.7       | -35.365161°            | -9.221726°  | RL/APP private                   |
| 3           | 4,350.5       | -36.423631°            | -9.236324°  | REBIO Pedra Talhada              |
| 4           | 1,543.7       | -36.069309°            | -8.925022°  | RL/APP Serra Grande              |
| 5           | 3,784.8       | -35.849775°            | -9.013029°  | RL/APP Coimbra                   |
| 6           | 11,691.2      | -35.896117°            | -9.186831°  | APA/ESEC Murici                  |
| 7           | 6,599.6       | -35.612793°            | -9.424574°  | RPPN Carlos Lyra/RPPN Placas     |
| 8           | 1,518.0       | -35.743227°            | -9.509216°  | RL/APP private                   |
| 9           | 1,943.4       | -35.902415°            | -9.527661°  | RPPN Mata do Cedro               |
| 10          | 1,806.3       | -35.966321°            | -9.772597°  | RL/APP private                   |
| 11          | 1,765.4       | -36.054924°            | -9.907802°  | RL/APP private                   |
| 12          | 1,843.1       | -36.123073°            | -9.944656°  | RL/APP private                   |
| 13          | 1,927.3       | -36.158540°            | -10.017720° | RL/APP private                   |

28

29 **Table S3** Land use and cover conflicts in Permanent Preservation Areas (PPAs) and Legal  
 30 Reserves (LRs) (% and ha) for each ecological corridor established between priority fragments  
 31 in the study area.

| Land use and cover classes   | PPA   |       | LR    |       |
|------------------------------|-------|-------|-------|-------|
|                              | %     | ha    | %     | ha    |
| <i>Corridor I</i>            |       |       |       |       |
| Pasture                      | 7.16  | 2.44  | 23.10 | 0.61  |
| Sugarcane                    | 0.64  | 0.22  |       |       |
| Mosaic agriculture and crops | 14.33 | 4.88  | 65.90 | 1.74  |
| Natural vegetation           | 77.85 | 26.51 | 10.98 | 0.29  |
| Total                        |       | 34.05 |       | 2.64  |
| <i>Corridor II</i>           |       |       |       |       |
| Pasture                      |       |       | 4.07  | 1.33  |
| Mosaic agriculture and crops |       |       | 6.53  | 2.13  |
| Natural vegetation           |       |       | 89.38 | 29.15 |
| Total                        |       |       |       | 32.61 |

| <i>Corridor III</i>          |       |      |       |        |
|------------------------------|-------|------|-------|--------|
| Pasture                      | 18.03 | 0.46 | 7.33  | 2.38   |
| Sugarcane                    |       |      | 1.10  | 0.36   |
| Mosaic agriculture and crops | 12.15 | 0.31 | 6.16  | 2.00   |
| Natural vegetation           | 69.80 | 1.78 | 85.39 | 27.72  |
| Total                        |       | 2.55 |       | 32..46 |
| <i>Corridor IV</i>           |       |      |       |        |
| Pasture                      | 21.78 | 0.22 | 4.08  | 1.38   |
| Sugarcane                    | 13.86 | 0.14 | 1.24  | 0.42   |
| Mosaic agriculture and crops | 42.57 | 0.43 | 10.79 | 3.65   |
| Natural vegetation           | 21.79 | 0.22 | 83.88 | 28.37  |
| Total                        |       | 1.01 |       | 33.82  |
| <i>Corridor V</i>            |       |      |       |        |
| Pasture                      | 100   | 1.52 | 1.82  | 0.20   |
| Mosaic agriculture and crops |       |      | 0.27  | 0.03   |
| Natural vegetation           |       |      | 97.89 | 10.70  |
| Total                        |       | 1.52 |       | 10.93  |

32

33 **Table S4** Values used for Least Cost Path analysis. The weights for each class (1-9 scale) and  
34 for each layer (%) were used in the Spatial Analyst tool, which considers different types of costs  
35 over a continuous surface. The same class weight values were used in the Linkage Mapper tool  
36 to create the resistance surface.

| Layer                                                     | Layer weight | Class | Class weight | Justification                                                                                                                              |
|-----------------------------------------------------------|--------------|-------|--------------|--------------------------------------------------------------------------------------------------------------------------------------------|
| Permanent Preservation Area (PPA) and Legal Reserves (LR) | 15%          | No    | 9            | Appropriate for corridors and low implementation cost - Sparovek et al. (2012)                                                             |
|                                                           |              | Yes   | 1            |                                                                                                                                            |
| Predefined Forest Fragments                               | 20%          | No    | 9            | Important for the maintenance of local and regional species diversity - Pardini et al. (2005); Step-stones - Garcez da Rocha et al. (2021) |
|                                                           |              | Yes   | 1            |                                                                                                                                            |
| Paved Roads                                               | 20%          | No    | 1            | High negative impacts - barrier, disturbance - Galantino et al. (2022); Ascensão et al.                                                    |
|                                                           |              | Yes   | 9            |                                                                                                                                            |

(2017)

---

|                    |     |                 |   |                                 |
|--------------------|-----|-----------------|---|---------------------------------|
|                    |     | Natural         | 1 |                                 |
|                    |     | Vegetation      |   |                                 |
|                    |     | Pasture         | 5 | Urban areas constitute barriers |
|                    |     | Sugarcane       | 5 | for the majority of species -   |
|                    |     | Urban           | 9 | McKinney (2002); Fauna          |
| Land use and cover | 45% | infrastructure  |   | moves preferentially through    |
|                    |     | Mosaic          |   | natural areas and areas with    |
|                    |     | agriculture and | 3 | less anthropogenic              |
|                    |     | crops           |   | disturbances - Umetsu and       |
|                    |     | River           | 5 | Pardini (2007)                  |
|                    |     | Others          | 3 |                                 |

---

37

38 **Table S5** A comprehensive list of all small terrestrial mammal species to the Pernambuco  
39 Endemism Center in the state of Alagoas, Brazil. The list has been adapted from the original  
40 publication by Feijó et al. (2023).

---

**Species**

---

**DIDELPHIMORPIA**

**Didelphidae**

*Caluromys philander* (Linnaeus, 1758)

*Marmosa murina* (Linnaeus, 1758)

*Marmosa demerarae* (Thomas, 1905)

*Monodelphis americana* (Müller, 1776)

*Monodelphis domestica* (Wagner, 1842)

*Cryptonanus agricolai* (Moojen, 1943)

*Gracilinanus agilis* (Burmeister, 1854)

**LAGOMORPHA**

**Leporidae**

*Sylvilagus brasiliensis* (Linnaeus, 1758) \*

**RODENTIA**

**Caviidae**

*Cavia aperea* Erxleben, 1777

*Galea spixii* (Wagler, 1831)

*Kerodon rupestris* (Wied- Neuwied, 1820)

## **Echimyidae**

*Phyllomys* sp.

## **Cricetidae**

*Akodon cursor* (Winge, 1887)

*Necomys lasiurus* (Lund, 1840)

*Oxymycterus dasytrichus* (Schinz, 1821)

*Cerradomys langguthi* Percequillo, Hingst-Zaher & Bonvicino, 2008

*Holochilus oxe* Prado, Knowles & Percequillo, 2021

*Hylaeamys oniscus* (Thomas, 1904) \*

*Nectomys squamipes* (Brants, 1827)

*Oecomys catherinae* Thomas, 1909

*Oligoryzomys nigripes* (Olfers, 1818)

*Oligoryzomys stramineus* Bonvicino & Weksler, 1998

*Oligoryzomys mottogrossae* (J. A. Allen, 1916)

*Rhipidomys mastacalis* (Lund, 1840)

41

---

## 42 **REFERENCES**

- 43 Ascensão, F., Lucas, P. S., Costa, A., & Bager, A. (2017). The effect of roads on edge  
44 permeability and movement patterns for small mammals: A case study with Montane Akodont.  
45 *Landscape Ecology*, 32(4), 781–793.
- 46 Galantino, A., Ascensão, F., & Mira, A. (2022). Effects of road verge management on small  
47 mammal movement in Mediterranean landscapes. *Journal of Applied Ecology*, 59(3), 674–685.
- 48 Garcez da Rocha, É., Brigatti, E., Niebuhr, B. B. S., Ribeiro, M. C., & Vieira, M. V. (2021).  
49 Dispersal movement through fragmented landscapes: The role of stepping stones and perceptual  
50 range. *Landscape Ecology*, 36, 3249–3267.
- 51 McKinney, M. L. (2002). Urbanization, biodiversity, and conservation. *BioScience*, 52(10),  
52 883–890.
- 53 Pardini, R., Souza, S. M., Braga-Neto, R., & Metzger, J. P. (2005). The role of forest structure,  
54 fragmentation, and local scale in shaping small mammal communities in the Brazilian Atlantic  
55 Forest. *Biological Conservation*, 124(2), 253–266.
- 56 Sparovek, G., Berndes, G., Klug, I. L. F., & Barretto, A. G. O. P. (2012). Brazilian agriculture  
57 and environmental legislation: Status and future challenges. *Environmental Science &  
58 Technology*, 46(10), 5284–5293.
- 59 Umetsu, F., & Pardini, R. (2007). Small mammals in a mosaic of forest remnants and  
60 anthropogenic habitats: Evaluating matrix quality in an Atlantic Forest landscape. *Landscape  
61 Ecology*, 22(4), 517–530.
